# Supplementary material for: Fuzzy modeling, maximum likelihood estimation, and Kalman filtering for target tracking in NLOS scenarios
Source: Springer Nature journal article supplement (doi:10.1186/1687-6180-2014-105), 2014-07-10

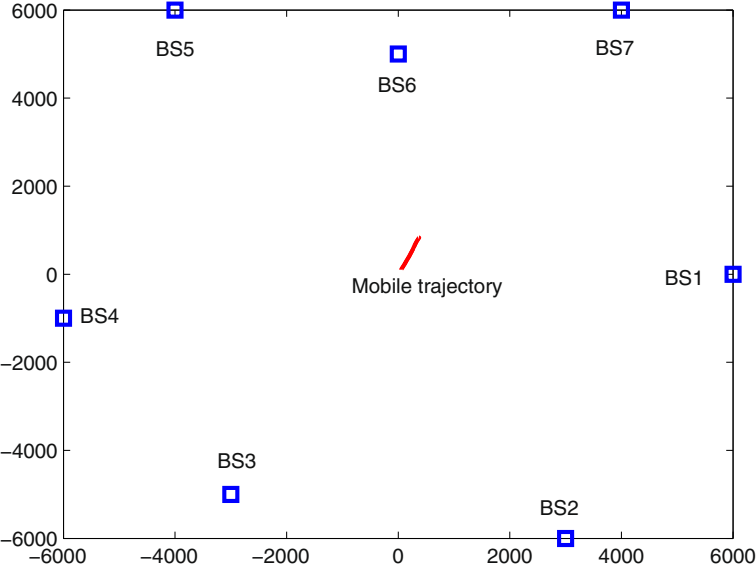

Supplement: 13634_2013_667_MOESM6_ESM.pdf [file 13634_2013_667_MOESM6_ESM.pdf]
